# Supplementary material for: Synthesis of cobalt-doped V2O3with a hierarchical yolk–shell structure for high-performance lithium-ion batteries
Source: Royal Society of Chemistry journal article supplement (doi:10.1039/c9ce01771b), 2020-01-01
Supplement: c9ce01771b1.pdf [file c9ce01771b1.pdf]

## Electronic Supplementary Information

### Synthesis of cobalt-doped $V_2O_3$ with hierarchical yolk-shell structure for high-performance lithium-ion batteries

Shuai Zhang,<sup>a</sup> Li Zhang,<sup>\* a, b</sup> Guancheng Xu,<sup>a</sup> Xiuli Zhang,<sup>a</sup> Aihua Zhao<sup>a</sup>

<sup>a</sup> Key Laboratory of Energy Materials Chemistry, Ministry of Education; Key Laboratory of Advanced Functional Materials, Autonomous Region; Institute of Applied Chemistry, Xinjiang University, Urumqi, 830046, Xinjiang, P. R. China

<sup>b</sup> Physics and Chemistry Detecting Center, Xinjiang University, Urumqi, 830046, Xinjiang, P. R. China

\* Corresponding author. E-mail: zhanglixju@163.com. Tel./Fax: +86-991-8580586

## Characterization materials

The crystal phase of Co-V<sub>2</sub>O<sub>3</sub>-24 and pure V<sub>2</sub>O<sub>3</sub> were investigated by powder X-ray diffraction (PXRD, Bruker D8 advance diffractometer, Cu K $\alpha$  radiation,  $\lambda=0.15405$  nm) in the  $2\theta$  range of  $10^{\circ}\sim 80^{\circ}$ . Microscopic morphologies and structure were characterized by field-emission scanning electron microscopy (FESEM, Hitachi S-4800), low-magnification transmission electron microscope (TEM, Hitachi H-600), and high-resolution TEM (HRTEM, JEOL, JEM-2100). The elemental mapping and chemical composition were performed on energy-dispersive X-ray spectroscope (EDX) attached to the FESEM. The elemental valence was detected by X-ray photoelectron spectroscopy (XPS, ESCALAB 250 Xi) from Thermo Fisher Scientific.

## Electrochemical measurements

All CR2032 type coin cells were assembled in a glove box filled with argon and containing less than 1 ppm of water and oxygen. The lithium foil was regarded as counter and reference electrode, Celgard 2300 as the separator and 1 M LiPF<sub>6</sub> in ethylene carbonate (EC)/ethyl methyl carbonate (EMC)/dimethyl carbonate (DMC) (1:1:1, v:v:v). The working electrode was prepared by full mixing active materials (60 wt %), carbon black (30 wt %) and polyvinylidene fluoride (PVDF, 10 wt %) in N-methyl pyrrolidone (NMP). The homogeneous slurry was coated onto Copper foil and then dried at 80 °C in vacuum oven for 12 h. Cyclic voltammetry (CV) curves were tested through electrochemical workstation (CHI660D, Chenhua, China) within the potential range of 0.01~3 V. Galvanostatic charge-discharge cycles were conducted by testing system (Land CT2001A, Wuhan, China) in the voltage range of 0.01~3 V at the room temperature. Electrochemical impedance spectroscopy (EIS) were carried out by using Zahner Elektrik electrochemical workstation within the frequency range of 100 kHz to 0.01 Hz under open circuit voltage.

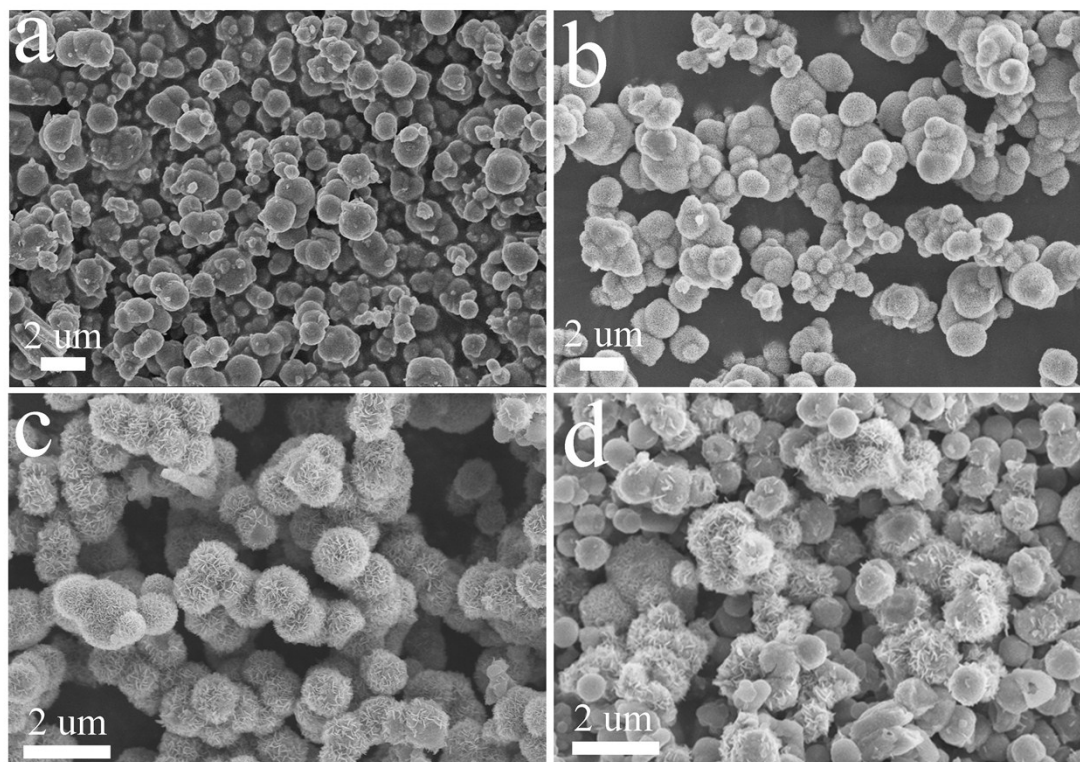

**Figure S1.** FESEM images with the different doping content of Co(NO<sub>3</sub>)<sub>3</sub>·6H<sub>2</sub>O: 0 mmol (a), 0.05 mmol (b), 0.1 mmol (c), 0.15 mmol (d).

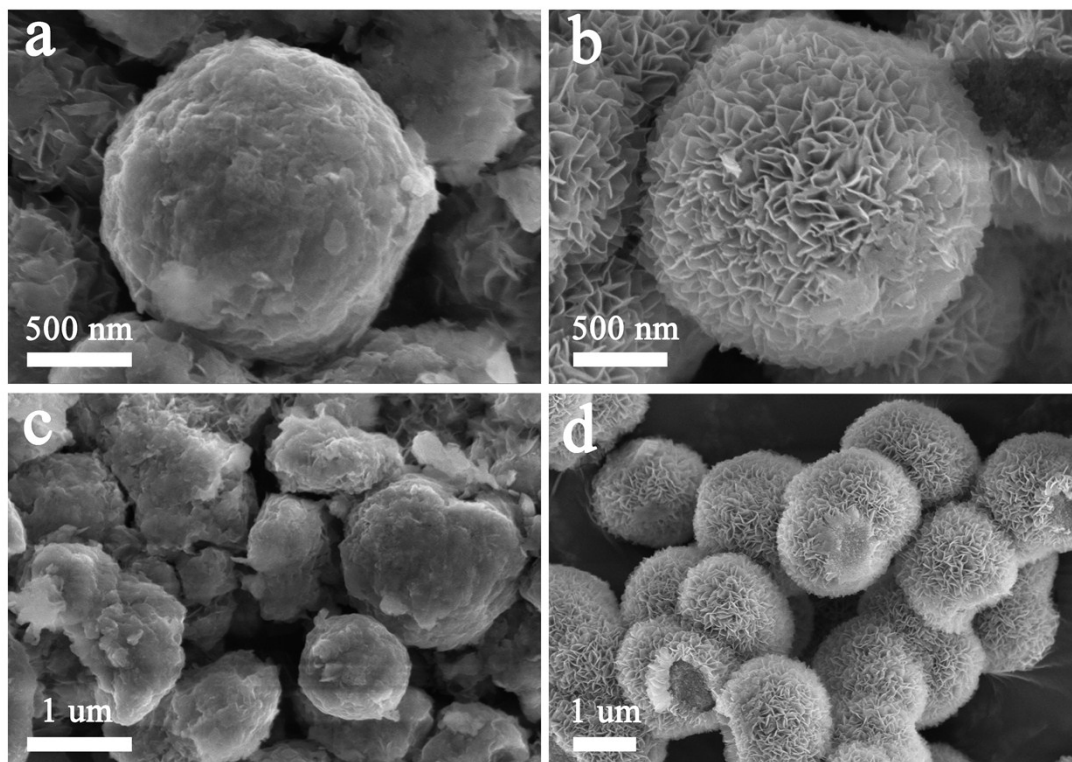

**Figure S2.** The effects of different metal salts on the morphology of products. (a, c) 0.1 mmol  $\text{Co}(\text{CH}_3\text{COO})_2 \cdot 4\text{H}_2\text{O}$ ; (b, d) 0.1 mmol  $\text{Ni}(\text{NO}_3)_2 \cdot 6\text{H}_2\text{O}$ .

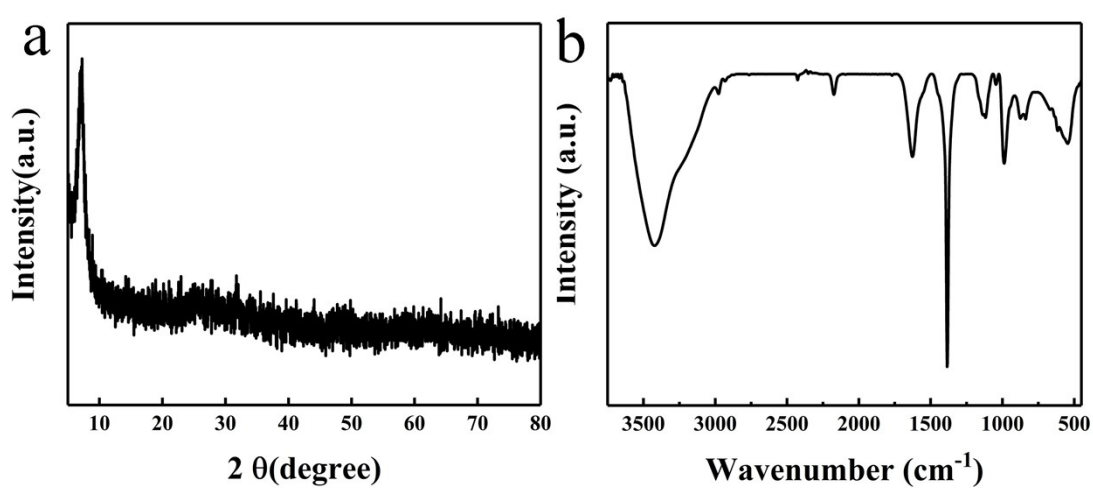

**Figure S3.** The XRD pattern (a) and FTIR (b) of Co-doped vanadium alkoxide precursors after solvothermal for 24 h.

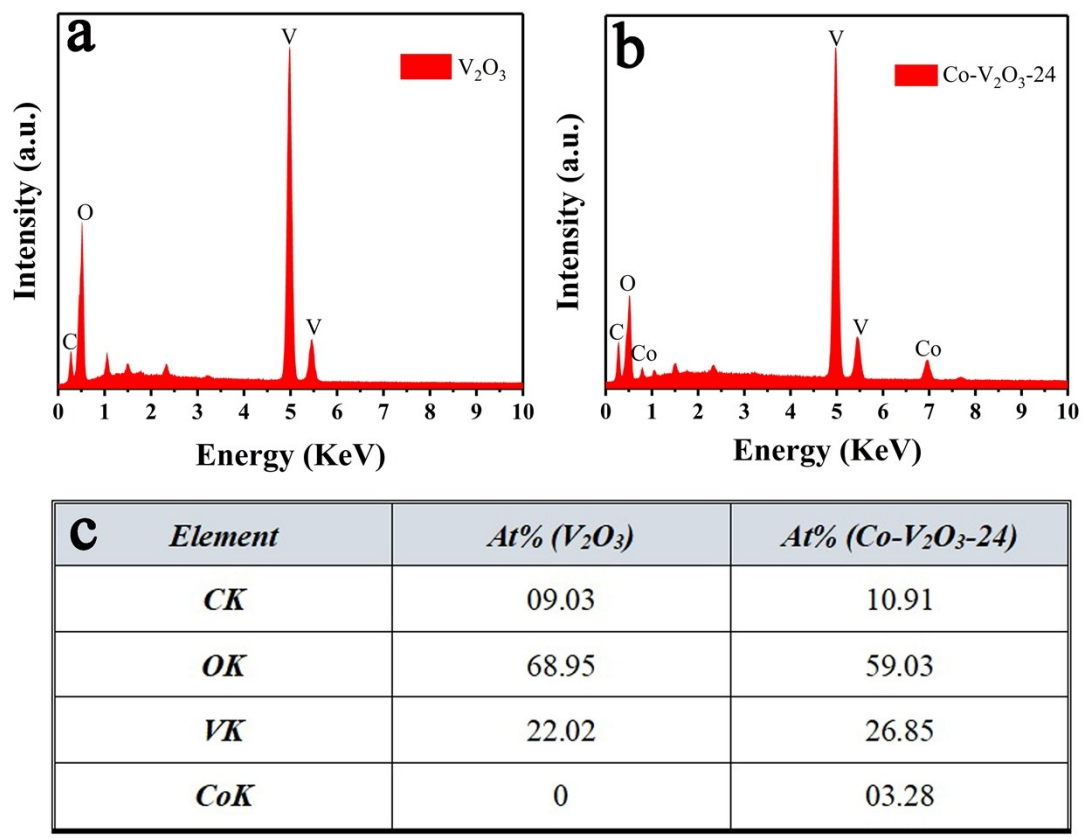

Figure S4. EDS spectra of  $V_2O_3$  (a) and  $Co-V_2O_3-24$  (b), atomic percentage of  $V_2O_3$  and  $Co-V_2O_3-24$  (c).

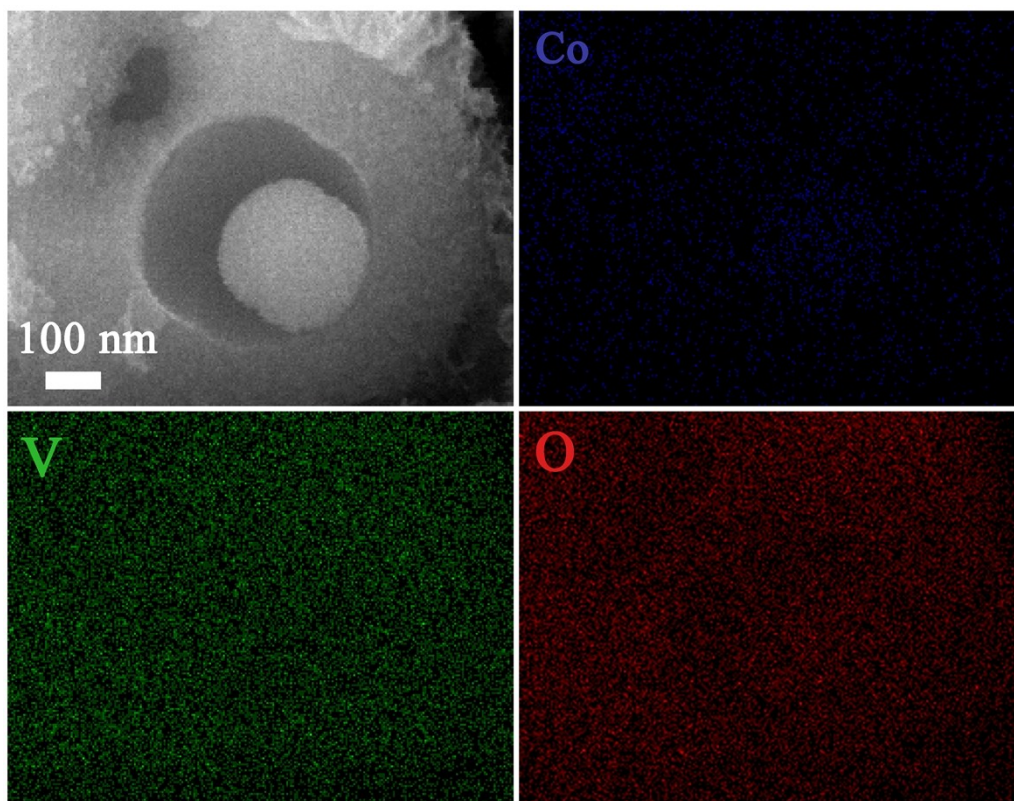

Figure S5. EDX mapping images of broken  $Co-V_2O_3-24$

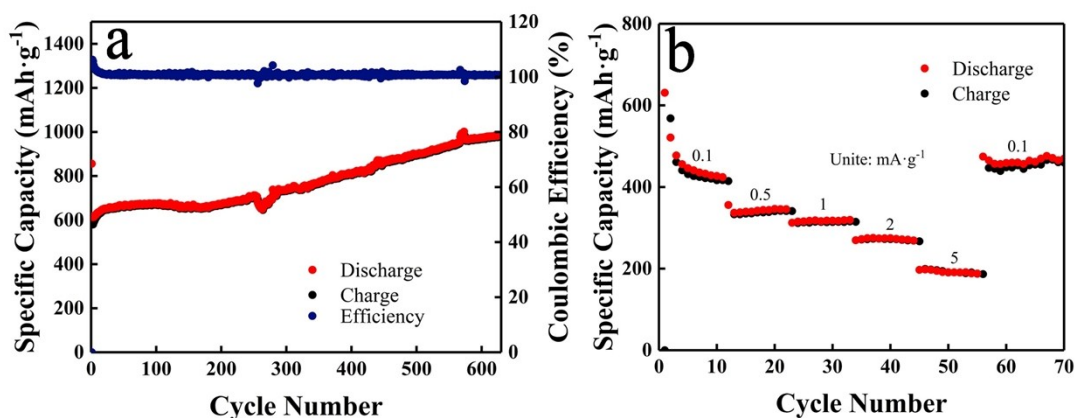

Figure S6. (a) The cycling performance and coulombic efficiency of Co-V<sub>2</sub>O<sub>3</sub>-24 at 0.5 A·g<sup>-1</sup>. (b) Rate performance of pure V<sub>2</sub>O<sub>3</sub>.

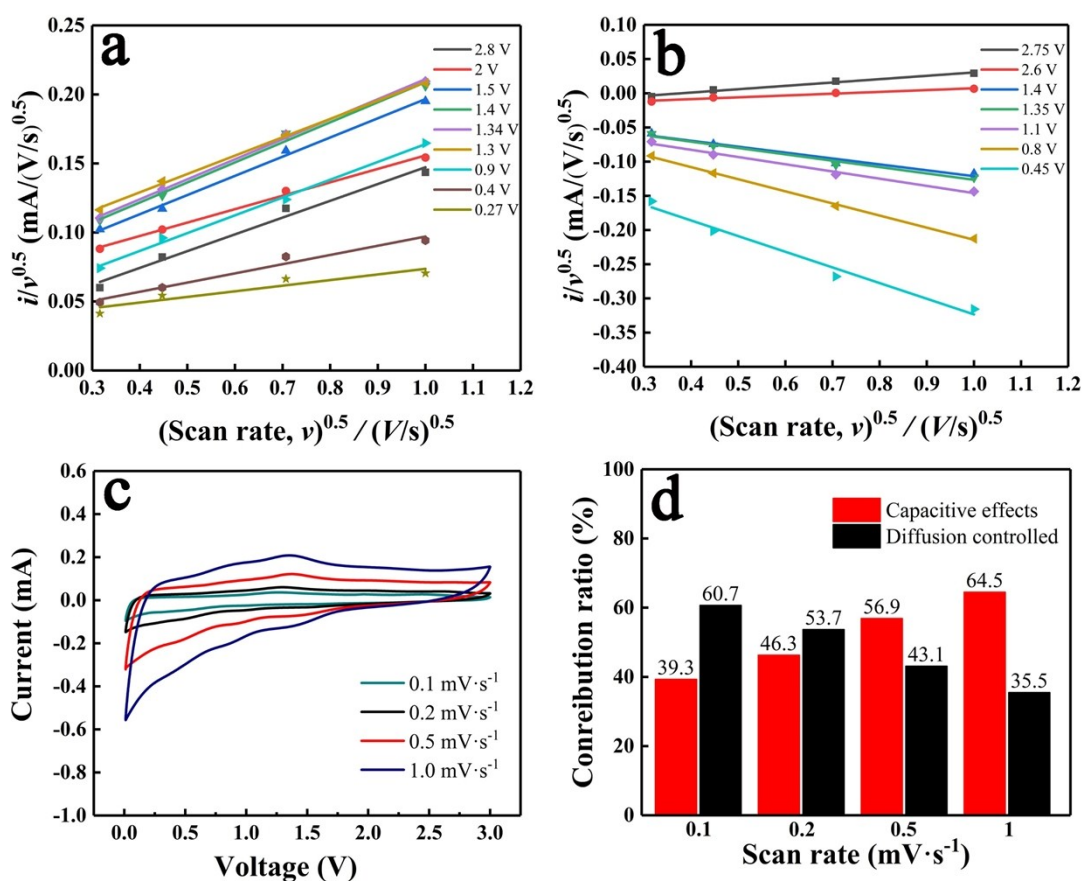

Figure S7. The lines of  $i/v^{0.5}$  vs.  $v^{0.5}$  used to evaluate  $k_1$  and  $k_2$  at various potentials (a, b). CV curves of Co-V<sub>2</sub>O<sub>3</sub>-24 at various scan rate (c). Contribution ratio of the capacitive effect and diffusion-controlled at different scan rates (d).

**Table S1.** The value of  $R_s$  and  $R_{ct}$  after fitting with equivalent circuit

| Electrode                          | $R_s(\Omega)$ | $R_{ct}(\Omega)$ |
|------------------------------------|---------------|------------------|
| Pure $V_2O_3$ before cycling       | 1.7           | 324.4            |
| Co- $V_2O_3$ -24 before cycling    | 2.5           | 263.3            |
| Co- $V_2O_3$ -24 after 200 cycles  | 1.9           | 198.5            |
| Co- $V_2O_3$ -24 after 2200 cycles | 10.13         | 252.1            |

**Table S2.** Comparison between other reports and our work of vanadium oxide as anode materials for LIBs

| Vanadium oxide anode                                                                     | Current density<br>( $A \cdot g^{-1}$ ) | Discharge capacity<br>( $mAh \cdot g^{-1}$ ) | Reference |
|------------------------------------------------------------------------------------------|-----------------------------------------|----------------------------------------------|-----------|
| Porous vanadium<br>oxides@C<br>heterostructure                                           | 0.1                                     | 569 (after 105<br>cycles)                    | 1         |
| Peapod-like CNT@ $V_2O_3$                                                                | 0.5                                     | 652.4 (after 200<br>cycles)                  | 2         |
| Carbon-Coated<br>Yolk-Shell $V_2O_3$<br>Microspheres                                     | 0.1                                     | 437.5 (after 100<br>cycles)                  | 3         |
| Carbon-supported and<br>nanosheet-assembled<br>vanadium oxide<br>microspheres            | 2                                       | 260 (after 7000<br>cycles)                   | 4         |
| pea-pod structured $V_2O_3$<br>yolk-shell microspheres<br>@N, S co-doped carbon<br>fiber | 0.1                                     | 793.7 (after 100<br>cycles)                  | 5         |
| Porous $V_2O_3$ @C hollow<br>spheres                                                     | 2                                       | 583 (after 800<br>cycles)                    | 6         |
| Hierarchical porous<br>intercalation-type $V_2O_3$                                       | 0.1                                     | 732 (after 136<br>cycles)                    | 7         |
| Carbon-confined $V_2O_3$<br>hollow spheres                                               | 2                                       | 472 (after 700<br>cycles)                    | 8         |
| $V_2O_3$ /porous N-doped<br>carbon                                                       | 0.5                                     | 436 (after 200<br>cycles)                    | 9         |
| 3D hierarchical yolk-<br>shell structure Co- $V_2O_3$ -<br>24                            | 0.5                                     | 986.2 (after 630<br>cycles)                  | This work |



## Notes and references

- 1 H.-E. Wang, X. Zhao, K. Yin, Y. Li, L. Chen, X. Yang, W. Zhang, B.-L. Su, G. Cao, ACS Appl. Mater. Inter. 2017, **9**, 43665-43673.
- 2 Y. Bai, Y. Tang, L. Liu, X. Li, Y. Gao, ACS Sustainable Chem. Eng. 2018, **6**, 14614-14620.
- 3 L. Jiang, Y. Qu, Z. Ren, P. Yu, D. Zhao, W. Zhou, L. Wang, H. Fu, ACS Appl. Mater. Inter. 2015, **7**, 1595-1601.
- 4 C. Niu, M. Huang, P. Wang, J. Meng, X. Liu, X. Wang, K. Zhao, Y. Yu, Y. Wu, C. Lin, L. Mai, Nano Res. 2015, **9**, 128-138.
- 5 W. Gou, X. Kong, Y. Wang, Y. Ai, S. Liang, A. Pan, G. Cao, Chem. Eng. J. 2019.
- 6 J. Wang, Z. Liu, W. Yang, L. Han, M. Wei, Chem. Commun. 2018, **54**, 7346-7349.
- 7 P. Liu, K. Zhu, Y. Xu, K. Bian, J. Wang, G. Tai, Y. Gao, H. Luo, L. Lu, J. Liu, Chem. Eur. J. 2017, **23**, 7538-7544.
- 8 C. Han, F. Liu, J. Liu, Q. Li, J. Meng, B. Shao, Q. He, X. Wang, Z. Liu, L. Mai, J. Mater. Chem. A 2018, **6**, 6220-6224.
- 9 D. Zhang, G. Li, B. Li, J. Fan, X. Liu, D. Chen, L. Li, J. Alloys Compd. 2019, **789**, 288-294.
